# Supplementary material for: Trinuclear zinc calix[4]arenes: synthesis, structure, and ring opening polymerization studies
Source: Royal Society of Chemistry journal article supplement (doi:10.1039/d2dt01496c), 2022-01-01
Supplement: d2dt01496c1.pdf [file d2dt01496c1.pdf]

## Electronic Supplementary Information

### Trinuclear zinc calix[4]arenes: Synthesis, structure, and ring opening polymerization studies†

Tian Xing,<sup>a</sup> Josef W. A. Frese,<sup>b</sup> Max Derbyshire,<sup>b</sup> Mollie A. Glenister,<sup>b</sup> Mark R. J. Elsegood,<sup>b</sup> and Carl Redshaw<sup>a\*</sup>

<sup>a</sup> *Plastics Collaboratory, Department of Chemistry, The University of Hull, Cottingham Road, Hull, HU6 7RX, U.K.*

<sup>b</sup> *Chemistry Department, Loughborough University, Loughborough, Leicestershire, LE11 3TU, U.K.*

#### Contents

#### Crystallography

**Figure S1.** Molecular structure of  $[\text{Zn}_3(\text{O}_2\text{CCH}_3)_2(\text{L}(\text{O})_2(\text{OMe})_2)_2] \cdot 6\text{MeCN}$  **1'**·6MeCN.

**Figure S2.** Alternative view of **2**·5MeCN

**Figure S3.** Molecular structure of the triclinic polymorph of  $\text{L}(\text{OH})_2(\text{On-pentyl})_2 \cdot \text{MeCN}$ .

**Figure S4.** Packing structure of  $\text{L}(\text{OH})_2(\text{On-pentyl})_2 \cdot \text{MeCN}$ .

**Table S1.** X-ray data for re-determined mono ligand polymorph.

#### Ring Opening Polymerization

**Figure S5.** MALTI-TOF spectrum of PCL from **2** (entry 11, table 1).

**Figure S6.** MALTI-TOF spectrum of PCL from **3** (entry 14, table 1).

**Figure S7.** MALTI-TOF spectrum of PCL from **6**/BnOH (entry 19, table 1).

**Figure S8.** <sup>1</sup>H NMR spectrum (CDCl<sub>3</sub>, 400 MHz, 298 K) of PCL from **5**/BnOH (entry 17, table 1).

**Figure S9.** <sup>1</sup>H NMR spectrum (CDCl<sub>3</sub>, 400 MHz, 298 K) of the PCL synthesized with **5** in the absence of BnOH (entry 18, Table 1).

## Crystallography

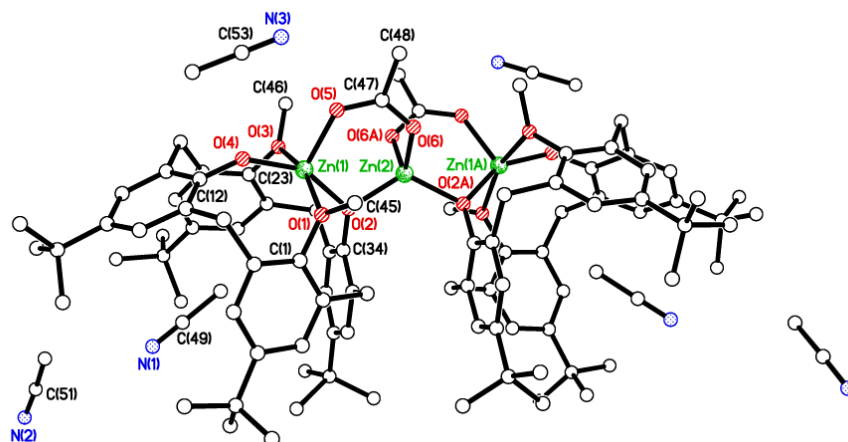

**Figure S1.** Molecular structure of  $[\text{Zn}_3(\text{O}_2\text{CCH}_3)_2(\text{L}(\text{O})_2(\text{OMe})_2)_2] \cdot 6\text{MeCN}$  H atoms and minor disorder components omitted for clarity.  $\mathbf{1} \cdot 6\text{MeCN}$ . Selected bond lengths ( $\text{\AA}$ ) and angles ( $^\circ$ ): Zn(1)-O(1) 2.2204(17), Zn(1)-O(2) 1.9963(18), Zn(1)-O(3) 2.2373(17), Zn(1)-O(4) 1.8919(19), Zn(2)-O(2) 1.9540(17), Zn(2)-O(6) 1.968(2); Zn(1)-O(2)-Zn(2) 107.97(9), O(2)-Zn(2)-O(2A) 121.68(11). Symmetry operator A =  $-x+0.5, y, -z$ .

In  $\mathbf{1} \cdot 6\text{MeCN}$ , the Zn(1) centre is 5-coordinate and is approximately trigonal bipyramidal as indicated by a structural index parameter of  $\tau = 0.20$  [7]. The central Zn(2) is 4-coordinate tetrahedral and is much less distorted than the central zinc centres found in **2** and **3**. One MeCN sits in each calixarene cavity and there are four others that lie *exo* to the molecule.

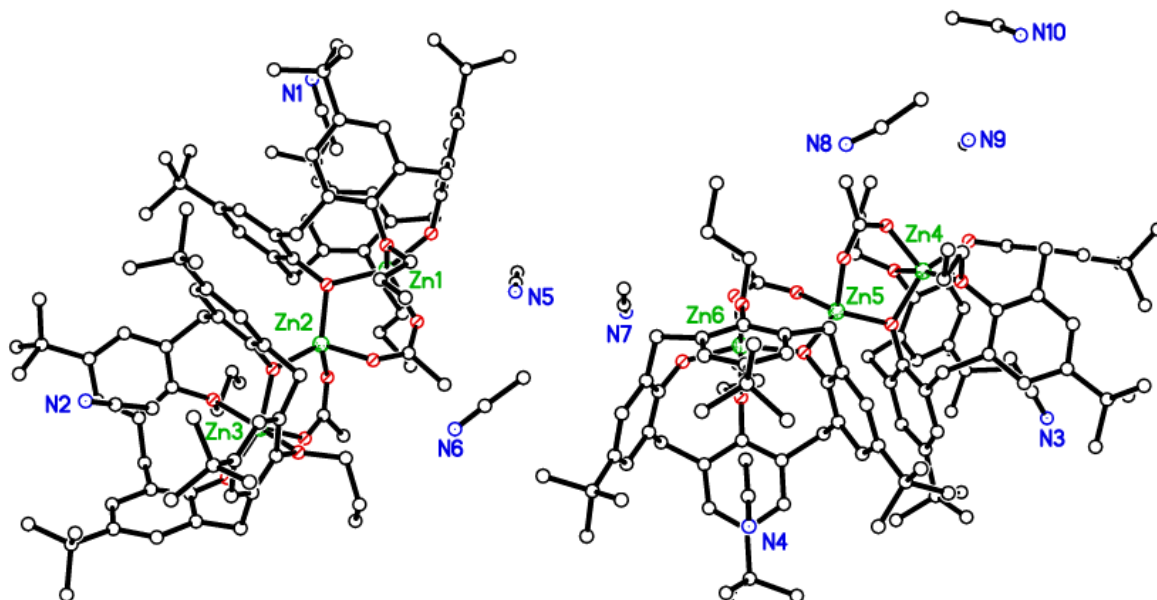

**Figure S2.** Alternative view of  $2 \cdot 5\text{MeCN}$  showing the full asymmetric unit but with H atoms and minor disorder components omitted for clarity.

In separate experiments conducted in an attempt to form  $3 \cdot 8\text{MeCN}$ , two different polymorphs of  $\text{L}(\text{OH})_2(\text{On-pentyl})_2 \cdot \text{MeCN}$  were isolated.

In the first structure, the crystal system is monoclinic and the asymmetric unit comprises  $\alpha\text{-L}(\text{OH})_2(\text{On-pentyl})_2 \cdot \text{MeCN}$  with  $Z' = 1$ , and we have reported this structure previously. [S1] Since the data quality are considerably improved on this occasion, we present here the improved results in Table S1.

**Table S1.** Crystal structure data for  $\alpha\text{-L}(\text{OH})_2(\text{Opentyl})_2$ .

| Compound                                   | $\alpha\text{-L}(\text{OH})_2(\text{On-pentyl})_2 \cdot \text{MeCN}$ |
|--------------------------------------------|----------------------------------------------------------------------|
| Formula                                    | $\text{C}_{56}\text{H}_{79}\text{NO}_4$                              |
| Formula weight                             | 830.20                                                               |
| Crystal system                             | Monoclinic                                                           |
| Space group                                | $P2_1/n$                                                             |
| Unit cell dimensions                       |                                                                      |
| $a$ (Å)                                    | 19.6259(2)                                                           |
| $b$ (Å)                                    | 11.52628(9)                                                          |
| $c$ (Å)                                    | 23.5831(3)                                                           |
| $\alpha$ (°)                               | 90                                                                   |
| $\beta$ (°)                                | 110.1060(13)                                                         |
| $\gamma$ (°)                               | 90                                                                   |
| $V$ (Å <sup>3</sup> )                      | 5009.70(10)                                                          |
| $Z$                                        | 4                                                                    |
| Temperature (K)                            | 100(2)                                                               |
| Wavelength (Å)                             | 1.54178                                                              |
| Calculated density (g cm <sup>-3</sup> )   | 1.101                                                                |
| Absorption coefficient (mm <sup>-1</sup> ) | 0.52                                                                 |

|                                                      |                    |
|------------------------------------------------------|--------------------|
| Crystal size (mm <sup>3</sup> )                      | 0.24 × 0.10 × 0.08 |
| $\vartheta$ (max) (°)                                | 68.3               |
| Reflections measured                                 | 46943              |
| Unique reflections                                   | 9146               |
| Reflections with $I > 2\sigma(I)$                    | 7991               |
| $R_{\text{int}}$                                     | 0.028              |
| Number of parameters                                 | 571                |
| $R_1 [F^2 > 2\sigma(F^2)]$                           | 0.052              |
| $wR_2$ (all data)                                    | 0.147              |
| GOOF, $S$                                            | 1.02               |
| Largest difference peak and hole (eÅ <sup>-3</sup> ) | 0.43 and -0.25     |

The second, new, triclinic polymorph is non-merohedrally twinned via a 180° rotation about direct space 1 0 0 and has  $Z' = 2$ . The two twin components have a ratio of 0.518:0.482(2), and data data quality is fairly poor. The crystal data are presented in table 2 in the main manuscript.

As for the monoclinic polymorph, one of the pentyl groups lies across the top of the calixarene and forms weak C–H···O interactions with one of the phenol oxygens. This is true for both independent molecules.

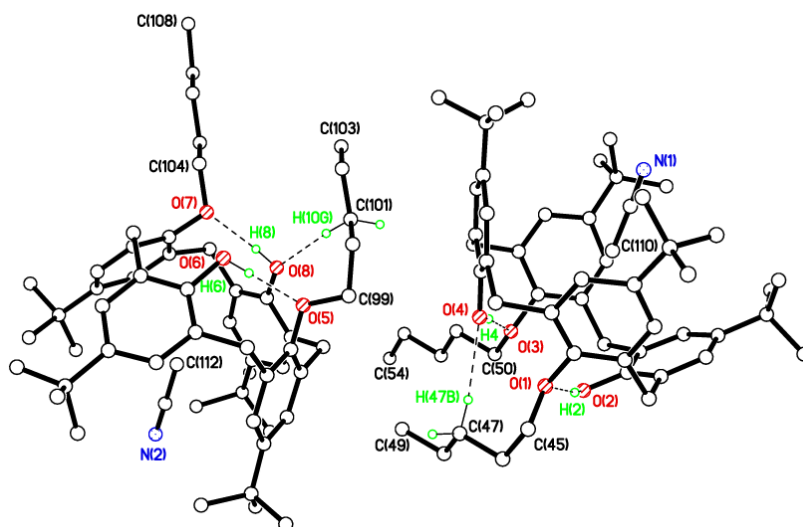

**Figure S3.** Molecular structure of the triclinic polymorph of  $\beta$ -L(OH)<sub>2</sub>(On-pentyl)<sub>2</sub>·MeCN showing the full asymmetric unit comprising two formula units. Most H atoms omitted for clarity.

Both polymorphs form layered structures, with both types of unique molecule within the same layer, and with hydrophobic & hydrophilic zones.

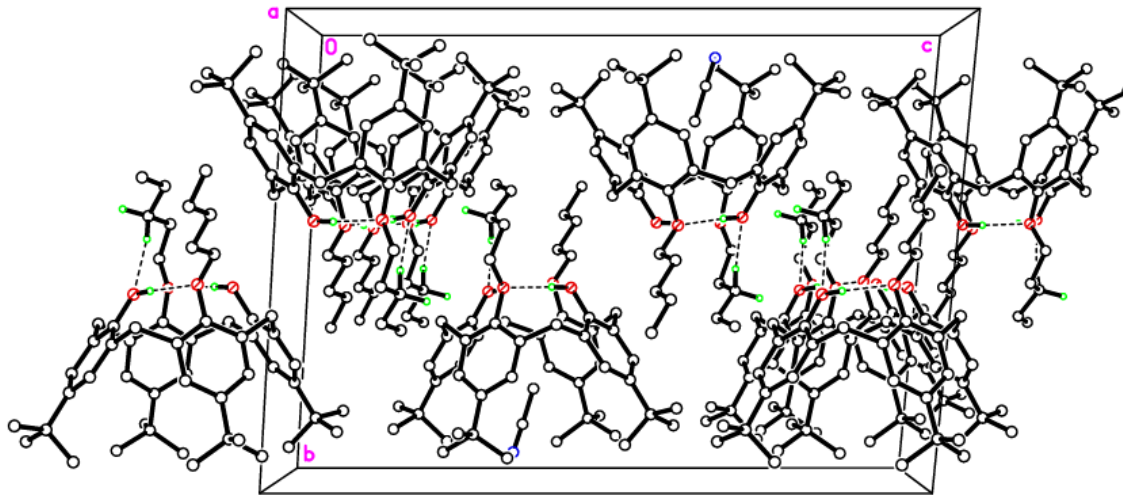

**Figure S4.** Packing structure of the triclinic polymorph  $\beta$ -L(OH)<sub>2</sub>(On-pentyl)<sub>2</sub>·MeCN.

### Ring opening polymerization

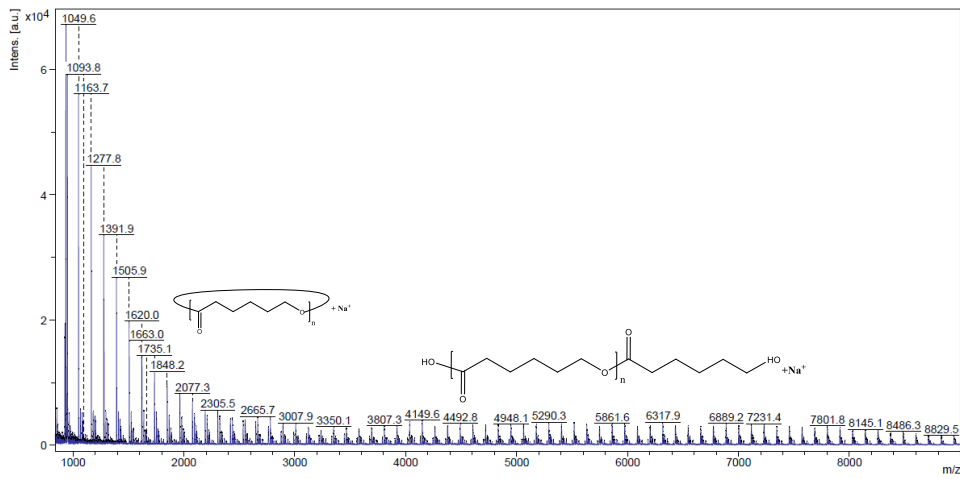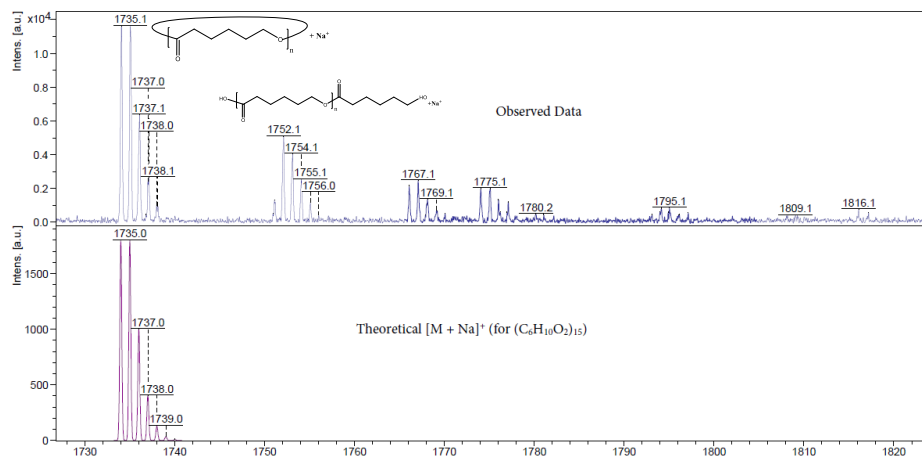

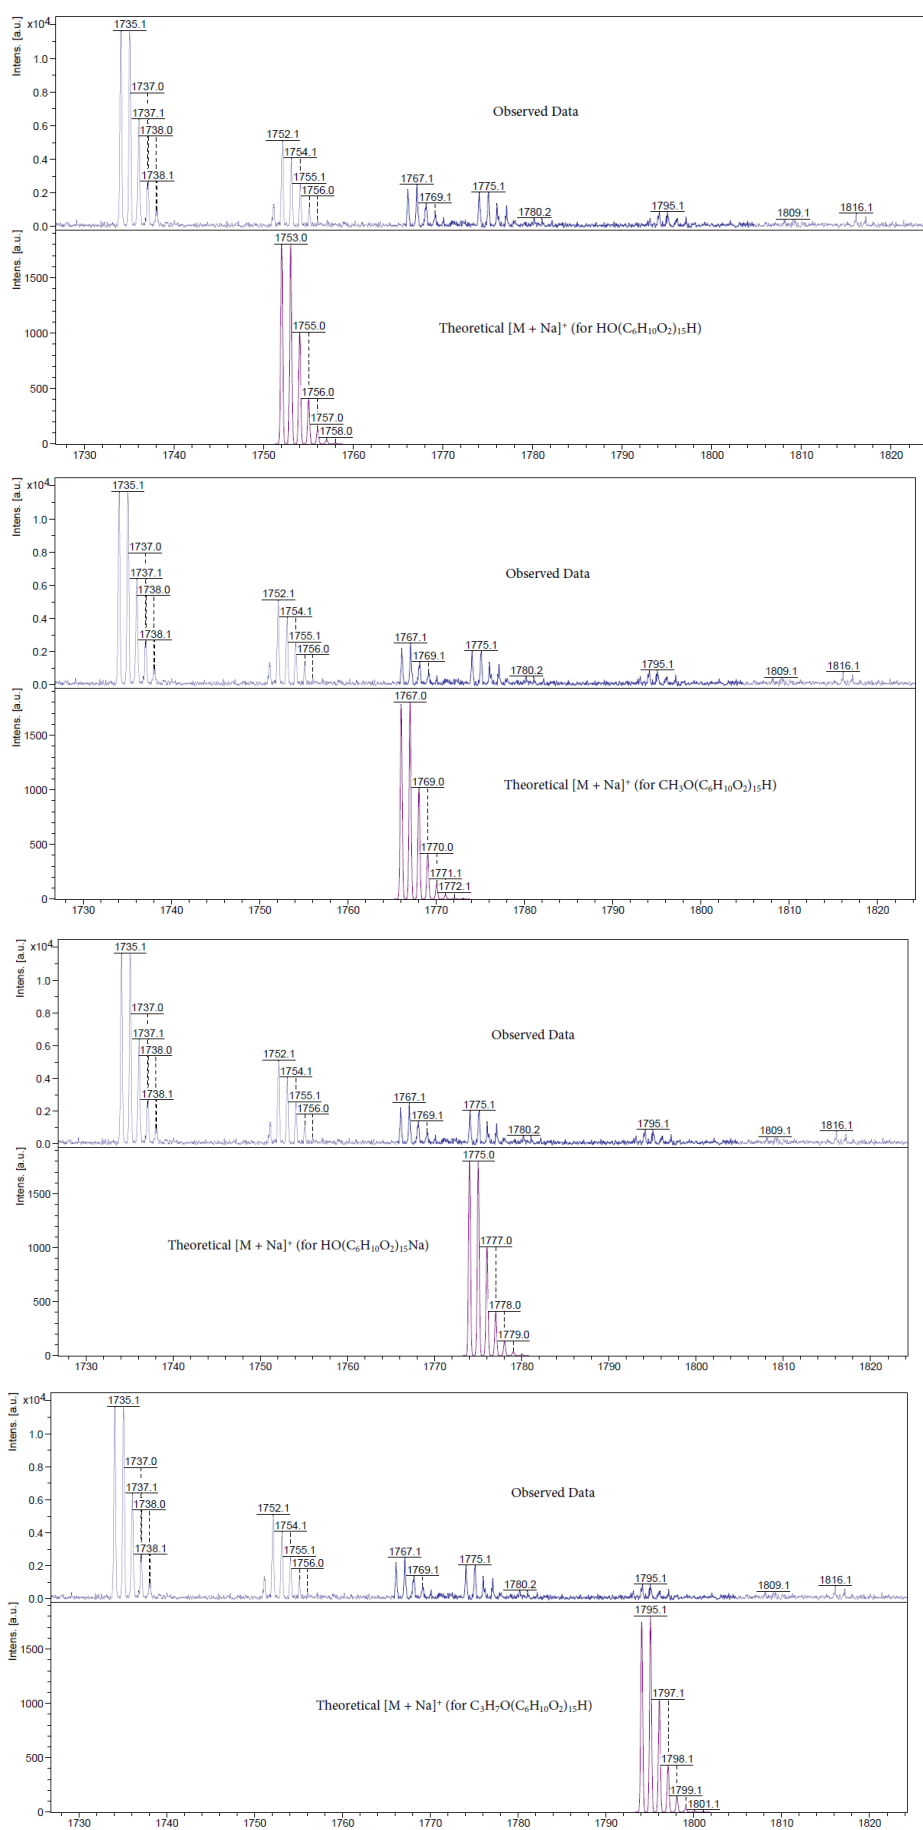

**Figure S5.** MALDI-TOF spectrum of PCL from **2** (entry 11, table 1). The main polymer are cyclic polymers  $[M = 22.99 (Na^+) + n \times 114.14 (CL)]$  (e.g. peak 1735 = (15 x

114.14)+23) and chain polymer (terminated by 2 OH) [ $M = 17(\text{OH}) + 1(\text{H}) + n \times 114.14$   
 (CL) + 22.99 (Na+)] (e.g. peak 1753 =  $(15 \times 114.14) + 23 + 18$ ).

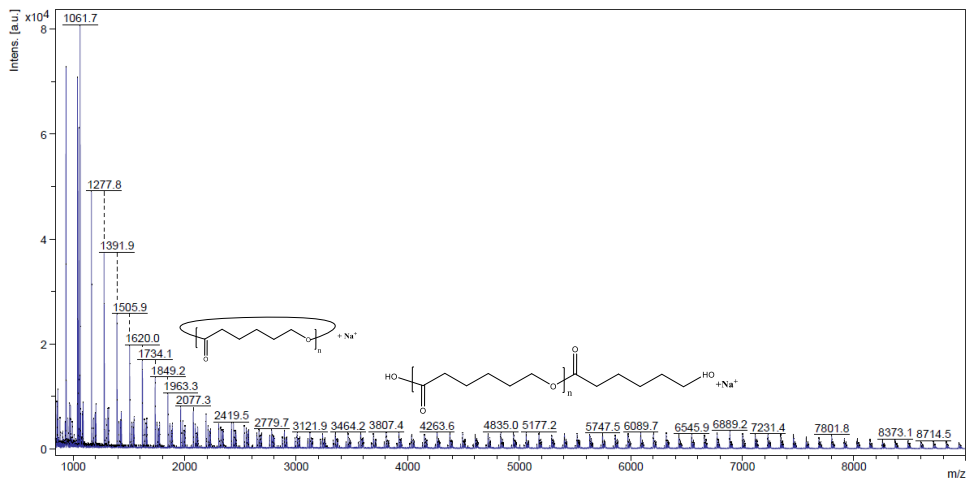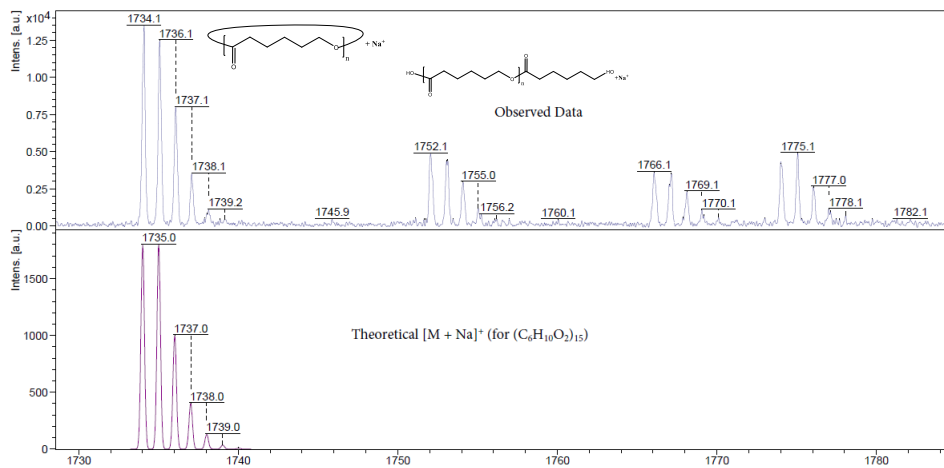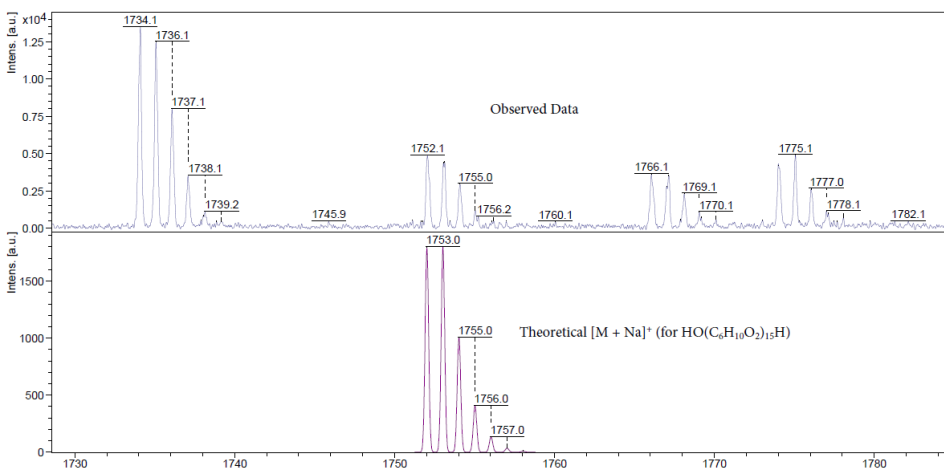

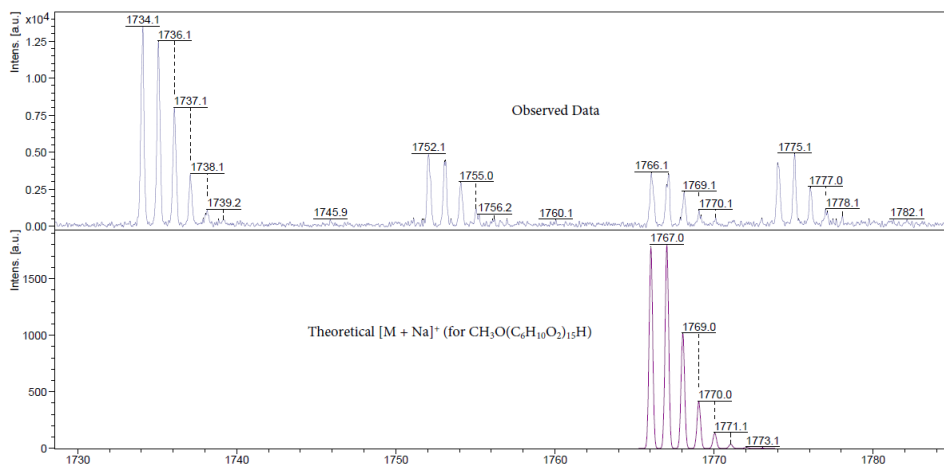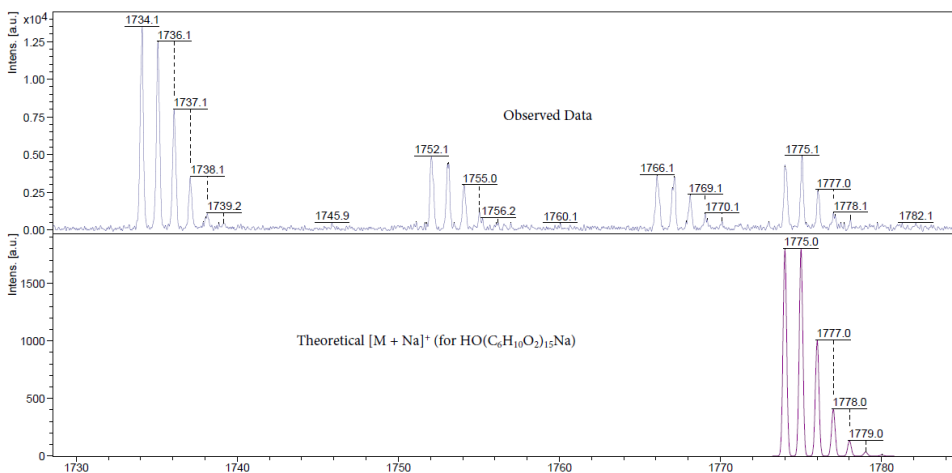

**Figure S6.** MALDI-TOF spectrum of PCL from **3** (entry 14, table 1). The main polymer are cyclic polymers  $[M = 22.99 (\text{Na}^+) + n \times 114.14 (\text{CL})]$  (e.g. peak 1734 =  $15 \times 114.14 + 23$ ) and chain polymer (terminated by 2 OH)  $[M = 17 (\text{OH}) + 1 (\text{H}) + n \times 114.14 (\text{CL}) + 22.99 (\text{Na}^+)]$  (e.g. peak 1752 =  $15 \times 114.14 + 23 + 18$ ).

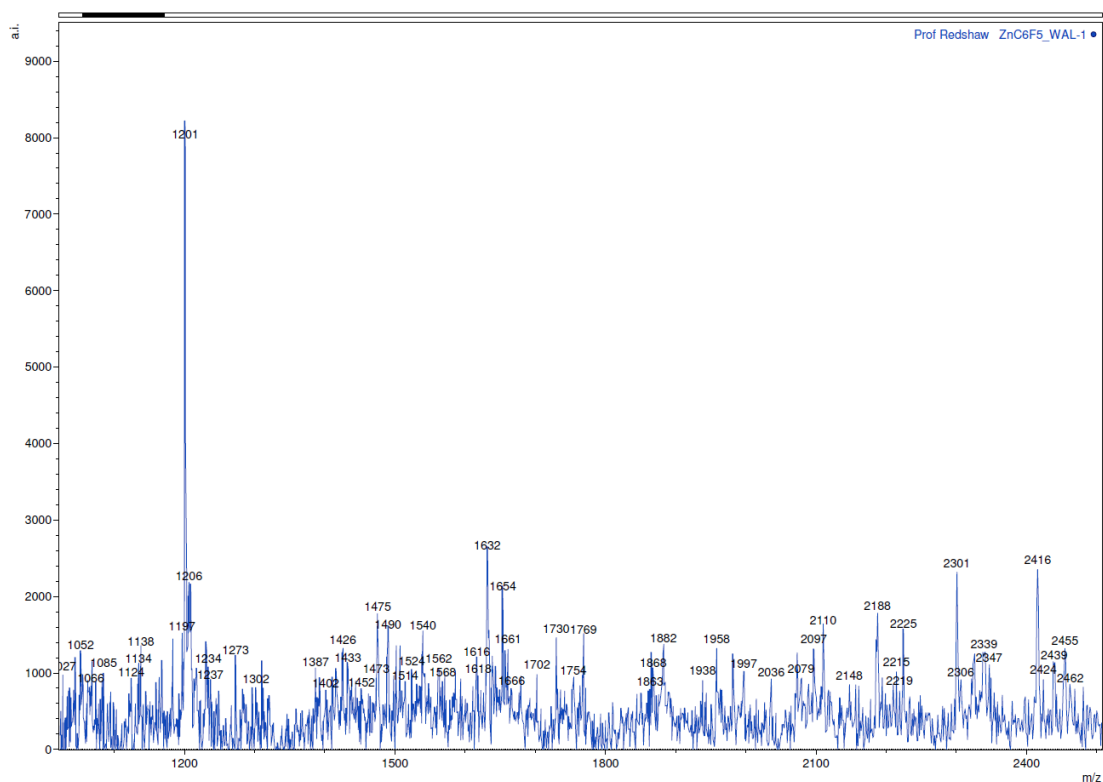



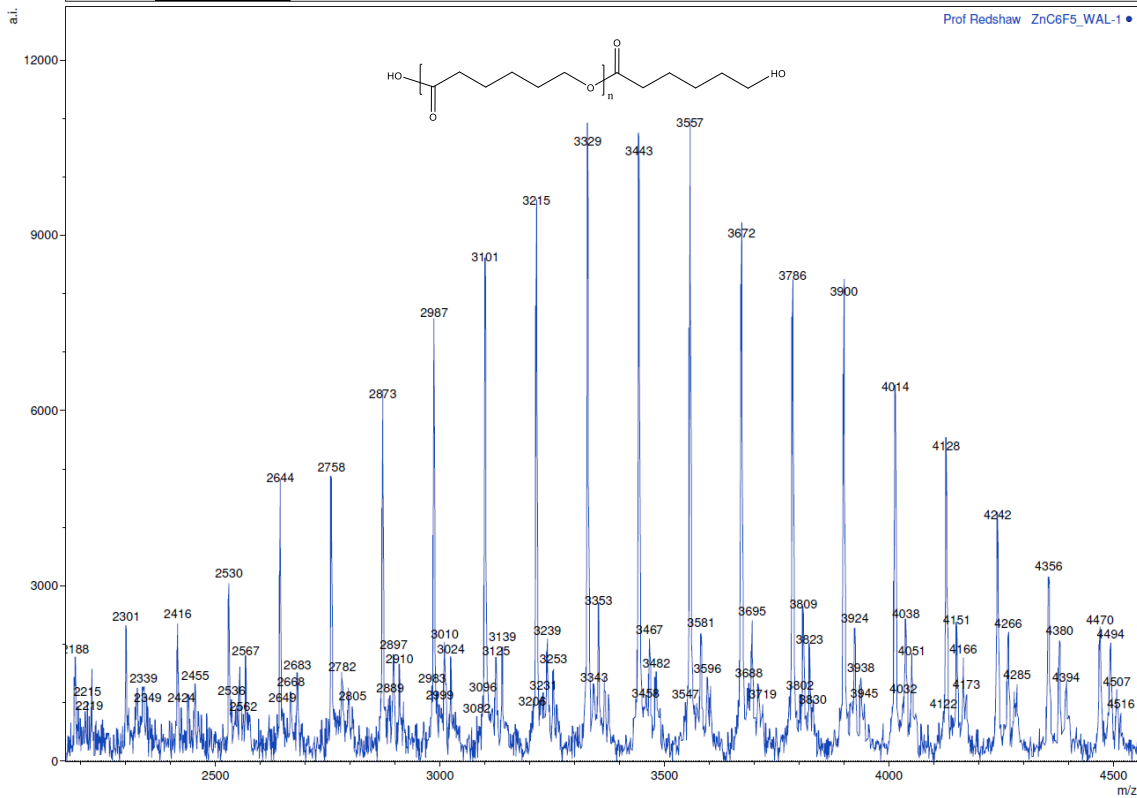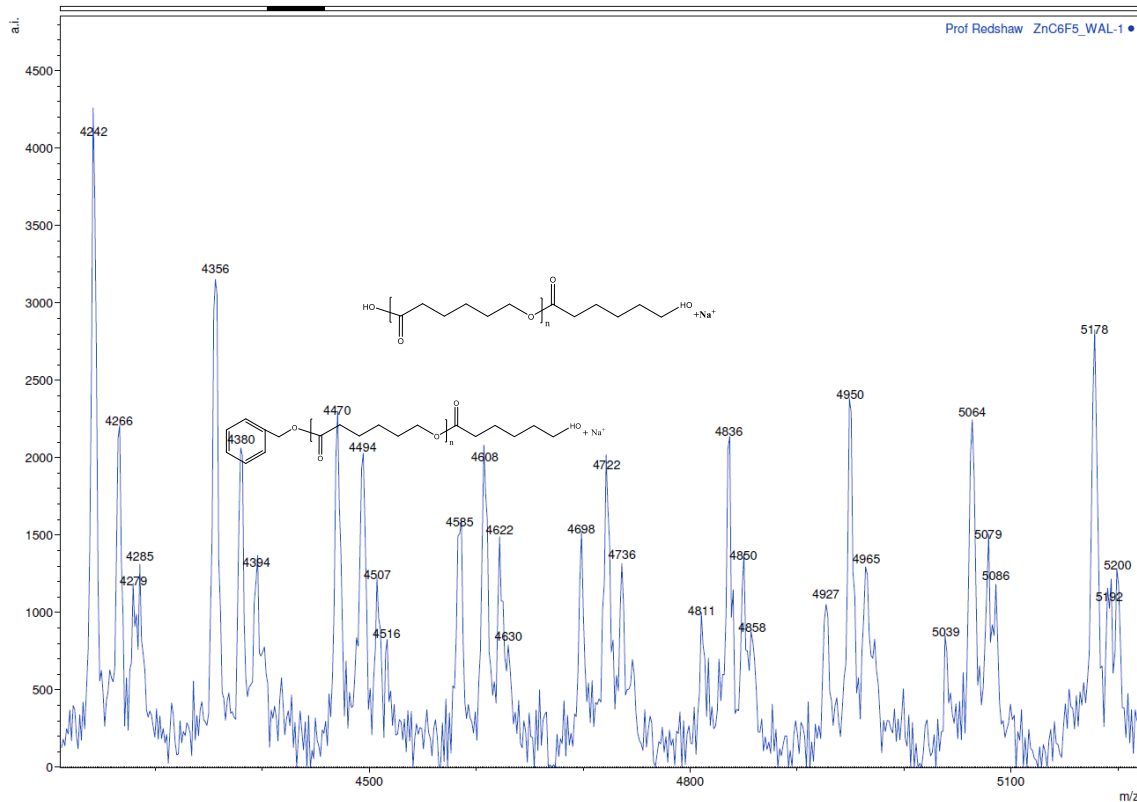

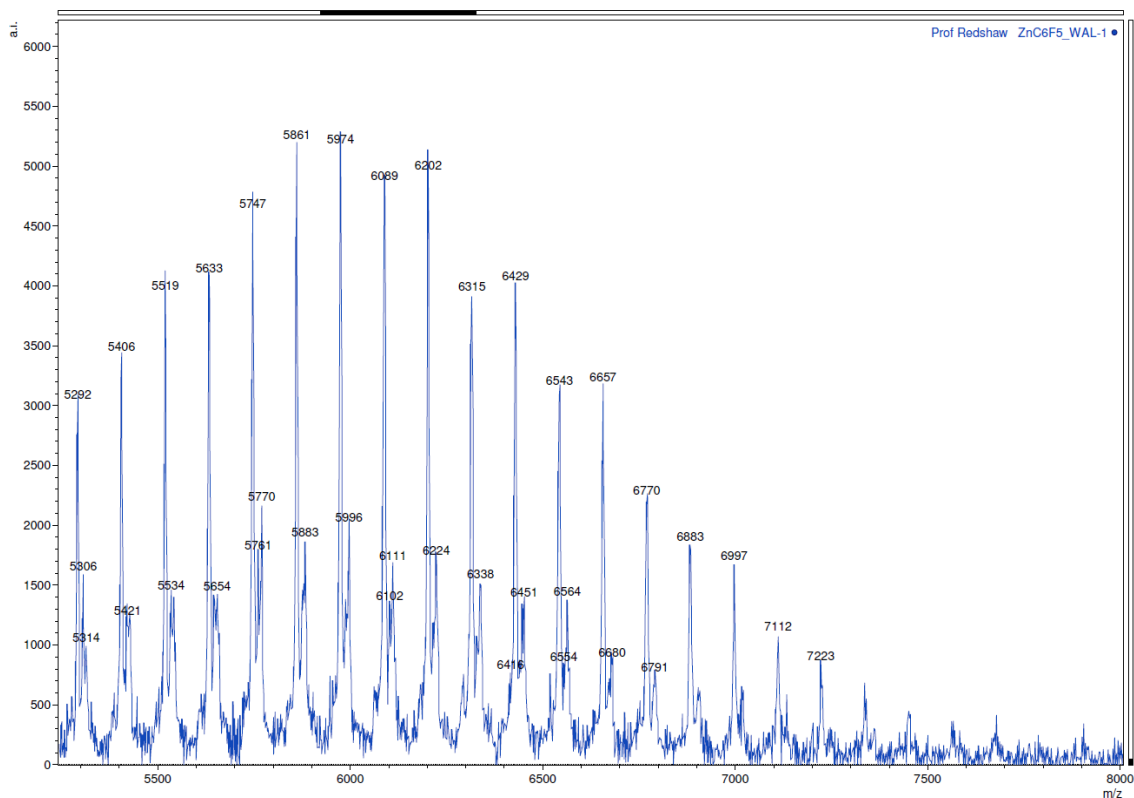

**Figure S7.** MALDI-TOF spectrum of PCL from **6**/BnOH (entry 19, Table 1). The main polymer are polymers with BnO end groups [ $M = n \times 114.12$  (CL) + 17 (OH) + 1(H)] (e.g. peak 3443 =  $114.14 \times 30 + 18$ ). The middle series ( $m/z$  4380, 4494, 4608, 4722 etc.) is likely HO-/H end groups and the third series ( $m/z$  4356, 4470, 4585, 4698 etc.) is likely CH<sub>3</sub>O-/H end groups.

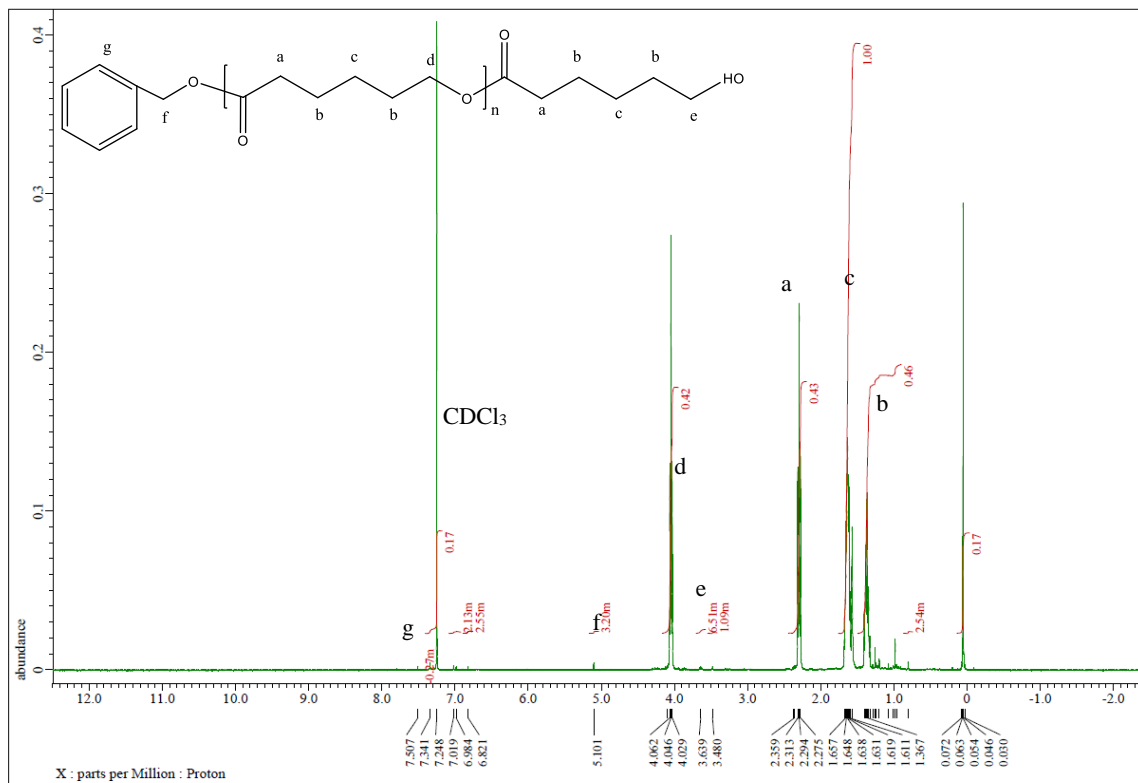

**Figure S8.**  $^1\text{H}$  NMR spectrum ( $\text{CDCl}_3$ , 400 MHz, 298 K) of PCL from **5**/BnOH (entry 17, table 1).

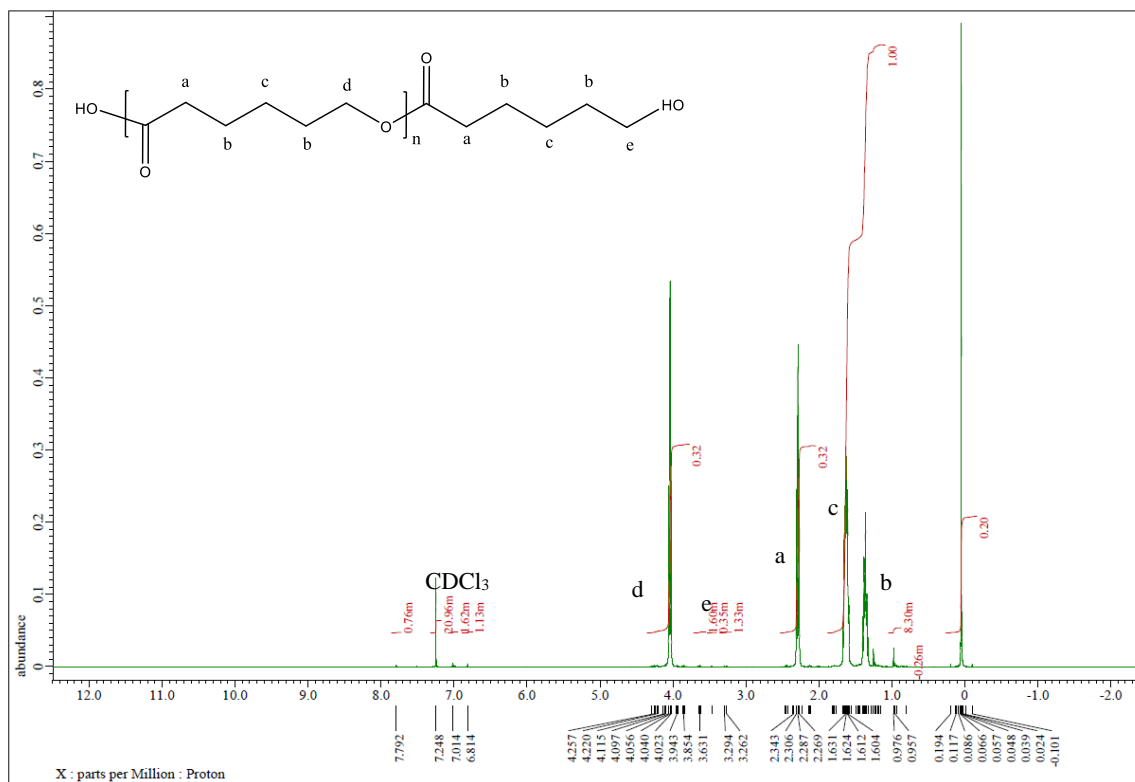

**Figure S9.**  $^1\text{H}$  NMR spectrum ( $\text{CDCl}_3$ , 400 MHz, 298 K) of the PCL synthesized with **5** in the absence of BnOH (entry 18, Table 1).

## References

[S1] C. Redshaw, M. R. J. Elsegood, J. A. Wright, H. Baillie-Johnson, T. Yamato, S. De Giovanni and A. Mueller, *Chem. Commun.* 2012, **48**, 1129-1131.
